# Supplementary material
Source: PubMed Central journal article supplement (PMC4573725)
Supplement: JB.00389-15_zjb999093777so1.pdf [file JB.00389-15_zjb999093777so1.pdf]

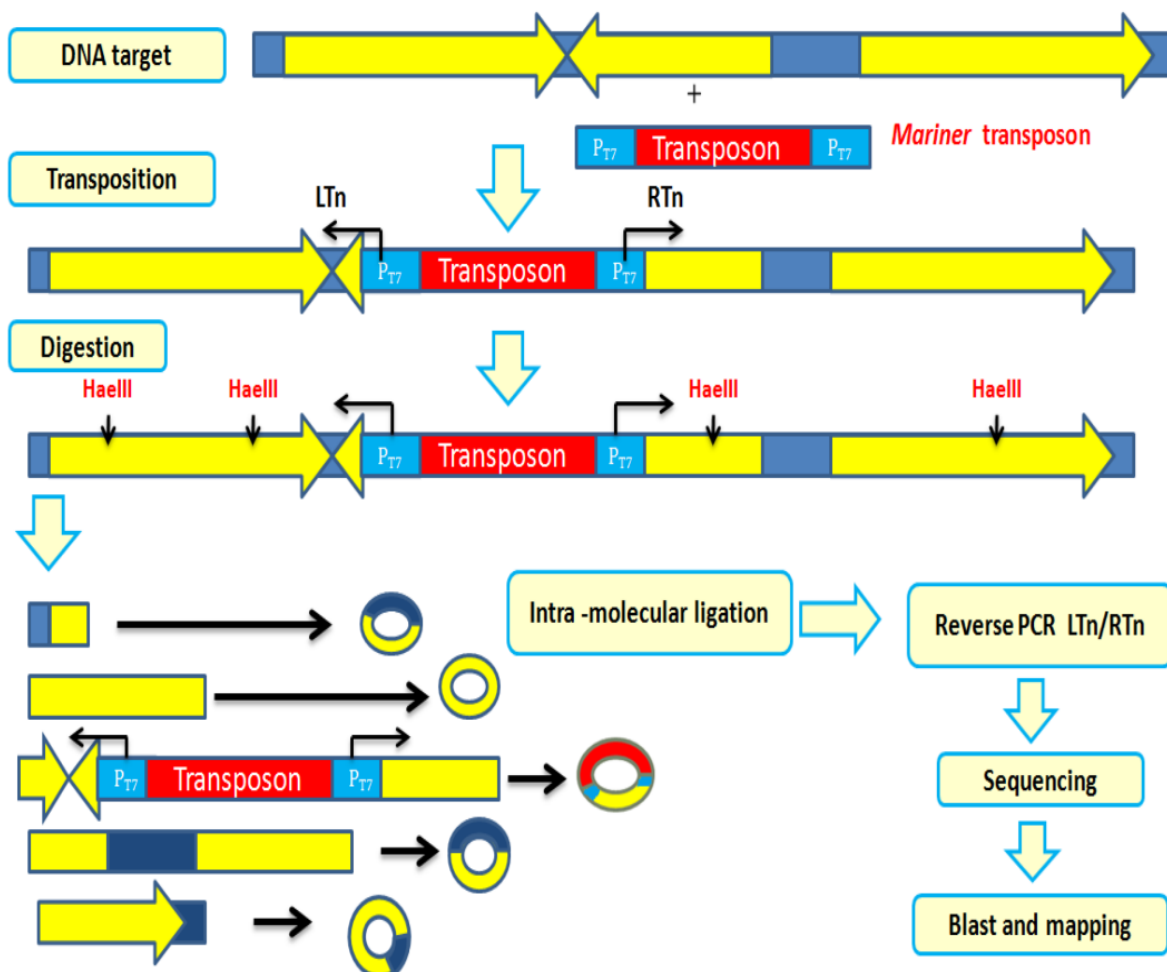

**Fig. S1. Schematic presentation of the mapping method for the transposon insertion sites.** To map the sites of transposon insertion, genomic DNA of mutants with partially restored tolerance screened from the transposon library was extracted and digested with *HaellI* endonuclease. The chromosomal parts attached to the transposon were amplified by PCR using the transposon specific primer pair LTn/RTn after circularization of the restriction fragments by ligation. The PCR products were purified and sequenced and the obtained sequences were blasted against the genome of *E. faecalis* strain OG1RF to locate the transposon sites.

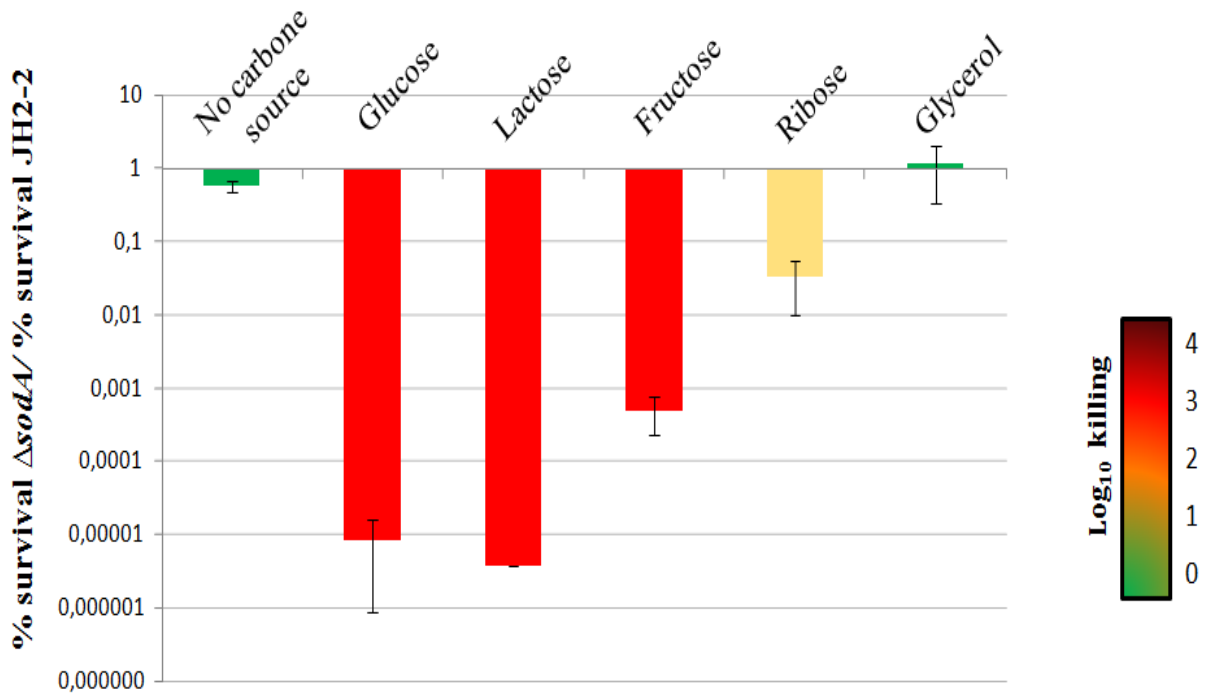

**Fig. S2. Bactericidal activity of penicillin is dependent on the energy source in *E. faecalis* JH2-2  $\Delta$ sodA mutant.** Ratio of relative survival of *E. faecalis* JH2-2 and its derivative JH2-2  $\Delta$ sodA mutant after 24 hours of exposure to 20  $\mu$ g/mL of penicillin in ccM17 MOPS medium supplemented with glucose, lactose, fructose, ribose or glycerol. Mean values of at least three different experiments are represented with error bars indicating standard deviations..

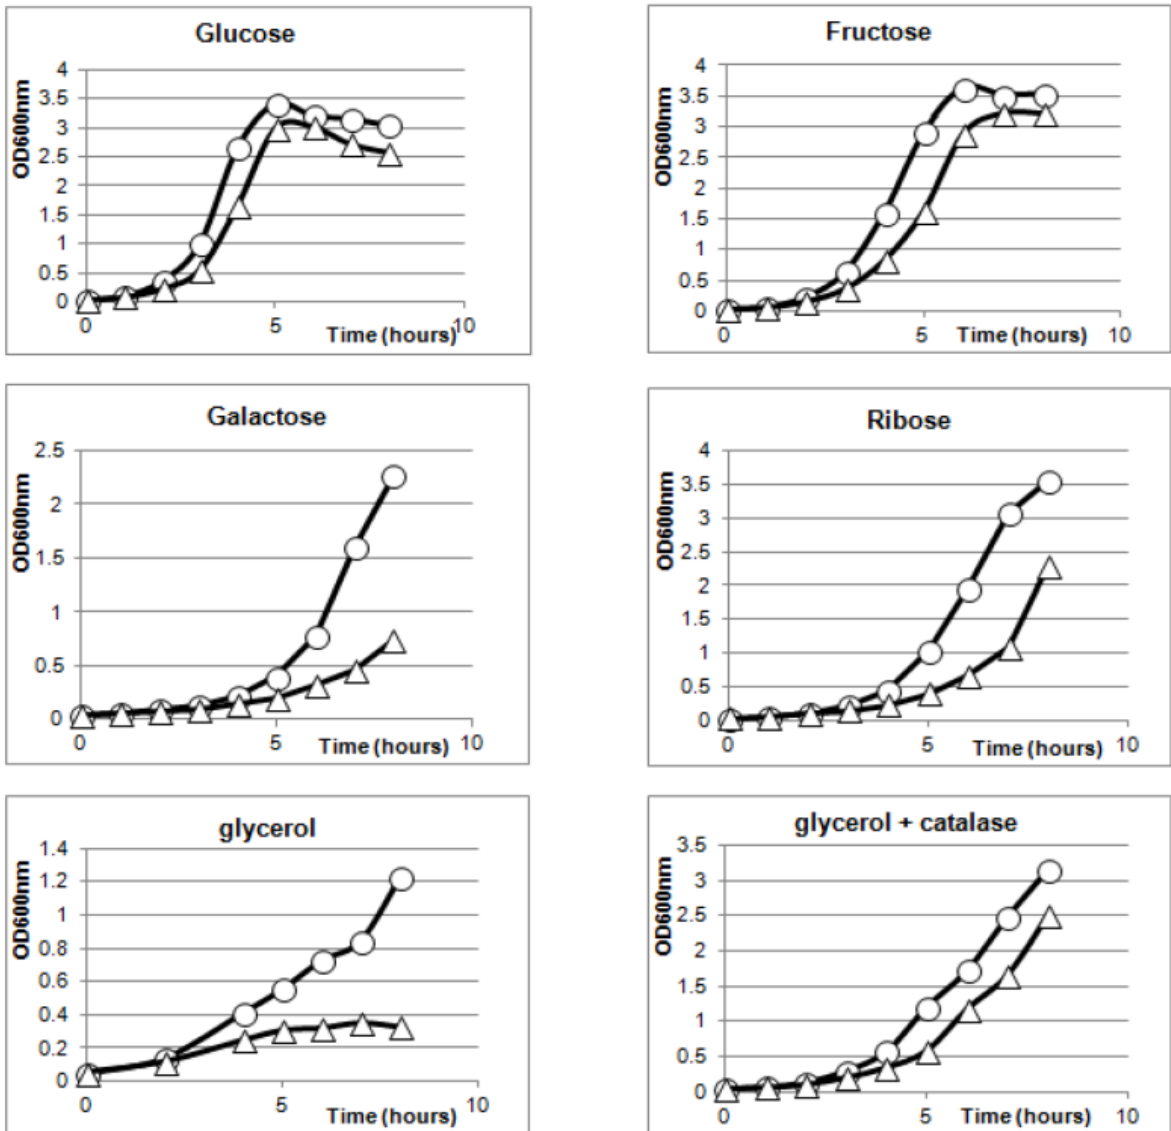

**Fig. S3. Growth of *E. faecalis* strains on different substrates.** Growth curves of *E. faecalis* JH2-2 wild-type (O) and its isogenic  $\Delta sodA$  mutant ( $\Delta$ ) under aerobic conditions (60 rpm) on ccM17MOPS medium supplemented with 0.5% of glucose, fructose, galactose, ribose or glycerol in presence or absence of catalase from bovine liver added to the medium at a final concentration of 500 U/ml are shown.

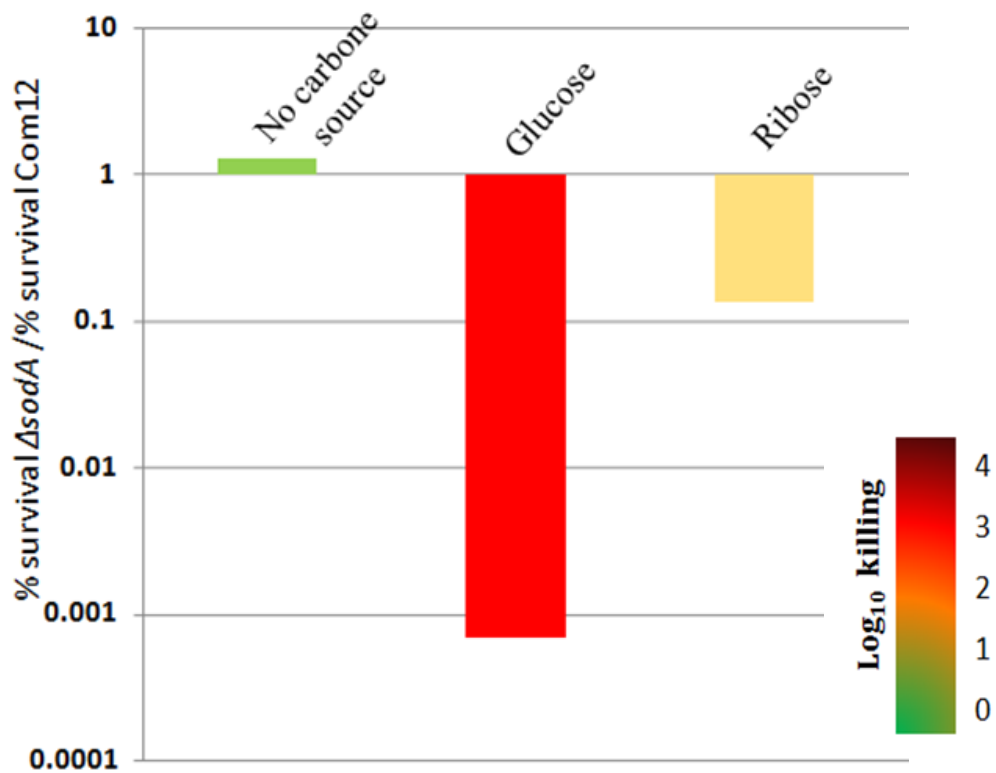

**Fig. S4. Bactericidal activity of vancomycin is dependent on the energy source in *E. faecium* Com12  $\Delta sodA$  mutant.** Ratio of relative survival of *E. faecium* Com12 and its derivative Com12  $\Delta sodA$  mutant after 24 hours of exposure to 20  $\mu\text{g/mL}$  of vancomycin in ccM17 MOPS medium supplemented with glucose or ribose. Only one experiment has been carried out for these results.

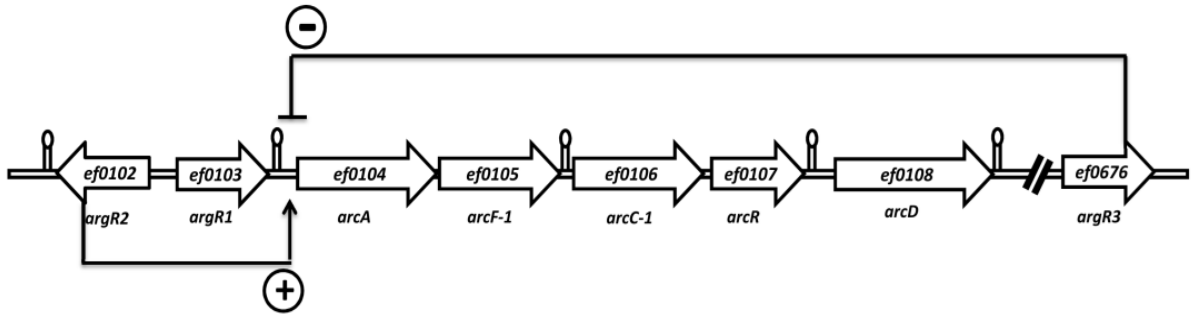

**Fig S5. Organization of ADI operon and its regulation in *E. faecalis*.** Structure and proposed regulation of expression by ArgR2 and ArgR3 of the arginine deiminase operon in *E. faecalis*.

**Table S1. Primers used in this study**

| Primer pair         | Sequence (5' – 3')*                                         |                                                               | Use                                |
|---------------------|-------------------------------------------------------------|---------------------------------------------------------------|------------------------------------|
|                     | Forward                                                     | Reverse                                                       |                                    |
| PU/ PR              | GTAAACGACGGCCAGT                                            | CAGGAAACAGCTATGAC                                             | Cloning verification               |
| pZXL5 for/pZXL5 Rev | TTCAAGCGTGGTGAAATGAG                                        | TACTTTGCCAGCGGACTTTT                                          | Screen the presence of pZXL5       |
| LTn/RTn             | GCCCCCTGAAATCCTTACAT                                        | AAACAGGAATTTATCGAAAATGGT                                      | Reverse PCR for transposon mapping |
| 104ForPst/104RevEco | <u>AAAAAACTGCAGCACAAGCAGAA</u><br>CATGATGCA ( <i>Pst</i> I) | <u>AAAAAAGAATTC</u> AATTGACGCAGC<br>ATCCGTTC ( <i>Eco</i> R1) | Cloning in pUCB30                  |
| 104verifF/104verifR | GCCAGATTATCTGGAGAGAC                                        | GAATTTACGATGTTCCCGA                                           | Cloning verification               |
| ef0102L/ef0102R     | TTCTCGTGACATTCGTGAGC                                        | TATTTTGGACGAAGGCAGA                                           | RT-qPCR                            |
| ef0103L/ef0103R     | GCGAGATAAATGTCGCACAA                                        | AAATCGTTAACCGCATCTCG                                          | RT-qPCR                            |
| ef0104L/ef0104R     | CGGTGAACACCGTAAATTCAT                                       | AAACAACCAACCACCTTCG                                           | RT-qPCR                            |
| ef0105L/ef0105R     | ACTGTTTGCCAGCCTTTCAT                                        | GCGGAAGACTTCATCCGTAA                                          | RT-qPCR                            |
| ef0106L/ef0106R     | TTGTCCAATGCGCTTAATCA                                        | ATGCCTCATCTGCTGGATCT                                          | RT-qPCR                            |
| ef0107L/ef0107R     | CATTACGACTCCGCGATTG                                         | TGAATCAATTGCTGGGGATT                                          | RT-qPCR                            |
| ef0676L/ef0676R     | CAGAAGTGGCTGGTACAGTGG                                       | TCATATTTTCGATGCGTTCG                                          | RT-qPCR                            |

\*Underlined sequences correspond to the recognition sites of the restriction endonucleases reported in parentheses
